# Supplementary material for: Genomic Analyses of Cladophialophora bantiana, a Major Cause of Cerebral Phaeohyphomycosis Provides Insight into Its Lifestyle, Virulence and Adaption in Host
Source: PLoS One. 2016 Aug 29;11(8):e0161008. doi: 10.1371/journal.pone.0161008 (PMC5003357; doi:10.1371/journal.pone.0161008)
Supplement: S14 Table — BP226: B. papendorfii UM 226; Cl956: C. bantiana UM 956; CN99: C. neoformans var. grubii H99; DE1020: D. eschscholtzii UM 1020; DE1400: D. eschscholtzii UM 1400; OM578: O. mirabilis UM 578; Py256: Pyrenochaeta sp. UM 256 and SS1099: S. schenckii strain 1099–18; ED: E. dermatitidis NIH/UT8656. (XLSX) [file pone.0161008.s020.xlsx]

## Sheet: Sheet1
Number of species	Gene Clusters	Number of gene families	Gene families
8	BP226 & Cl956 & DE1020 & DE1400 & ED & OM578 & Py256 & SS1099	1477	Clado4200	Clado4871	Clado1212	Clado4419	Clado3832	Clado4495	Clado3852	Clado4645	Clado4493	Clado4295	Clado4092	Clado4556	Clado5094	Clado3836	Clado4176	Clado3738	Clado5030	Clado4520	Clado11	Clado5161	Clado5039	Clado4637	Clado4516	Clado5099	Clado4145	Clado1434	Clado4276	Clado3700	Clado4626	Clado2580	Clado3707	Clado5080	Clado1383	Clado4337	Clado5183	Clado4589	Clado3776	Clado4307	Clado4416	Clado3996	Clado5051	Clado4132	Clado4967	Clado4656	Clado4384	Clado988	Clado4868
2	Cl956 & ED	921	Clado13134	Clado12617	Clado12621	Clado12389	Clado12780	Clado12430	Clado12400	Clado12975	Clado12528	Clado12667	Clado12740	Clado12652	Clado12603	Clado13154	Clado12849	Clado13043	Clado12704	Clado12452	Clado12898	Clado13004	Clado13168	Clado12869	Clado12382	Clado13116	Clado12643	Clado13269	Clado12939	Clado12582	Clado12821	Clado8447	Clado12922	Clado8375	Clado13209	Clado8438	Clado12999	Clado12685	Clado12302	Clado12871	Clado12918	Clado12336	Clado12828	Clado12457	Clado13087	Clado12437	Clado12836	Clado12487	Clado8476
1	Cl956	148	Clado10255	Clado10245	Clado8680	Clado7590	Clado10263	Clado10273	Clado10307	Clado8352	Clado11068	Clado10297	Clado11086	Clado8349	Clado8377	Clado11074	Clado8675	Clado10290	Clado11064	Clado10257	Clado8682	Clado209	Clado11076	Clado10309	Clado10271	Clado10300	Clado10250	Clado10278	Clado10313	Clado8387	Clado10295	Clado6695	Clado7588	Clado11061	Clado10284	Clado8364	Clado8677	Clado10247	Clado10302	Clado11079	Clado11070	Clado11060	Clado10316	Clado10299	Clado10276	Clado11082	Clado10266	Clado10252	Clado10259
[truncated: 1,430 more columns]
